# Supplementary material for: Gender-inclusive business models in livestock value chains in low- and middle-income countries: What can we learn from the literature?
Source: Frontiers journal article supplement (doi:10.3389/frsus.2022.958251), 2022-09-12
Supplement: Table_1.xlsx [file Table_1.xlsx]

## Sheet: Sheet1
Authors	Title	Sources	Link/ location of the paper	is there a business model/ approach for agricultural or livestock implemented (or tested)	gender disaggregated data or approach differs between women and men; or women only	Intervention takes place in a LMIC	decision- is the paper included or not	decision- based on final list of included paper	coded reason for exclusion	background paper? Yes/no	data screening person	comments	if paper is included, has data extraction been done? Yes/no	Optional --> Publication	Volume	Number	Pages	Year	Publisher
Sally Faulkner	‘I am a woman, what can I do?’ The challenges of targeting women in asset transfer programmes in Bangladesh	Emily's scoping review (Research4Life)	folder(litetarure_inclusive business models)	No- Looked at factors that influence the choice of assets of Bangladeshi women in an asset transfer programme	Women only	Yes	no	no	no business model		shakira Nagujja
German, Laura A; Bonanno, Anya M; Foster, Laura Catherine; Cotula, Lorenzo;	“Inclusive business” in agriculture: Evidence from the evolution of agricultural value chains	Google scholar (Isabelle)	https://www.sciencedirect.com/science/article/abs/pii/S0305750X20301443 Conceptual frameowrk may be useful for our paper	yes	yes	yes	no	no	insufficient information	yes	Isabelle			World Development	134		105018	2020	Elsevier
Lora Forsythe, Helena Posthumus and Adrienne Martin	A crop of one's own? Women’s experiences of cassava commercialization in Nigeria and Malawi	Alessandra's scoping review	folder	Yes- Commercialization opportunities in the value chain	gender disaggregated data	Yes-Malawi and Nigeria	yes	no	no business model	No	Shakira Nagujja		Yes	Journal of Gender, Agriculture and Food Security	1	2	110-128	2016
Elizabeth Waithanji, Jemimah Njuki, Samuel Mburu, Juliet Kariuki & Fredrick Njeru	A gendered analysis of goat ownership and marketing in Meru, Kenya	Emily's scoping review (Research4Life)	folder(litetarure_inclusive business models)	No	Gender disaggregated data	yes	no	no	no business model		shakira Nagujja
Hallberg, Kristin;	A market-oriented strategy for small and medium scale enterprises	Google scholar (Isabelle)		no	no	yes	no	no	no business model		Isabelle							2000	The World Bank
Magistro, John; Roberts, Michael; Haggblade, Steve; Kramer, Fritz; Polak, Paul; Weight, Elizabeth; Yoder, Robert;	A model for pro‐poor wealth creation through small‐plot irrigation and market linkages	Google scholar (Isabelle)		no	no	yes	no	no	no business model		Isabelle			Irrigation and Drainage: The journal of the International Commission on Irrigation and Drainage	56	2‐3	321-334	2007	Wiley Online Library
Kaminski, Alexander M; Kruijssen, Froukje; Cole, Steven M; Beveridge, Malcolm CM; Dawson, Claire; Mohan, Chadag V; Suri, Sharon; Karim, Manjurul; Chen, Oai Li; Phillips, Michael J;	A review of inclusive business models and their application in aquaculture development	Google scholar (Isabelle)		yes	yes	yes	no	no	no business model	yes	Isabelle	same literature review as ours but for aquaculture! They identify 7 inclusive businesss models, many of them would be relevant to our esearch		Reviews in Aquaculture				2020	Wiley Online Library
Kankuse, Teshome;	A Study on the opportunities and challenges of micro enterprise in empowering women The Case of Adami Tulu Jido Kombolcha District, East Shoa Zone Oromia Reginal State	Google scholar (Isabelle)		no	no	yes	no	no	no business model		Isabelle							2014	ST. MARY’S UNIVERSITY
Thorpe, Jodie; Mathie, Alison; Ghore, Yogesh;	A typology of market-based approaches to include the most marginalised	Google scholar (Isabelle)	https://opendocs.ids.ac.uk/opendocs/bitstream/handle/20.500.12413/12729/A%20typology%20of%20market%20based%20approaches%2019_01.pdf?sequence=632&isAllowed=y	yes	no	yes	yes	yes		yes	Isabelle		yes					2017	IDS
Kibrom A. Abay Nathaniel D. Jensen	Access to markets, weather risk, and livestock production decisions: Evidence from Ethiopia	Research4Life (Emily)		No	No	Yes	no	no	no business model	No	Emily			Agricultural Economics	51	4	577-593	2020	Wiley
Nyambura Ruth	Agrarian Transformation(s) in Africa: What’s in it for Women in Rural Africa?	Research4Life (Emily)	10.1057/s41301-016-0034-0	no	yes	yes	no	no	no business model					Development	52	2021-03-02	306-313	2012
Andre Devaux, Maximo Torero, Jason Donovan and Douglas Horton	Agricultural innovation and inclusive value-chain development: a review	Emily's scoping review (Research4Life)	folder(litetarure_inclusive business models)	No	General	yes	no	no	no business model		shakira Nagujja
Mazhir Nadeem Ishaq, Li Cui Xia, Rukhsana Rasheed, Zeeshan Ahmad, Muhammad Abdullah	Alternative Milk Marketing Channels and Dairy Performance of Smallholders in Pakistan: A Case of South Region of Punjab Province	Alessandra's scoping review	Folder	Yes- Marketing cooperaives	Gender disaggregated data	Yes-Pakistan	yes	no	insufficient information	No	Shakira Nagujja		Yes	Sarhad Journal of Agriculture	32	4	304-315	2016	Smith and Franklin
Fleming, Marie;	An Analysis of Women-Led Enterprises in the Mango Value Cahin in Emerging Economies: Case Study of Azuri Health Ltd. In Thika, Kenya	Google scholar (Isabelle)		yes	no	no	no	no	no gender		Isabelle							2020
Azanlerigu, James Abagna; Laary, Joseph Kinansua; Abambire, Hilda;	Analytical Study of Soybean Value Chain: The Perspective of Sissala East District in Ghana	Google scholar (Isabelle)		yes	no	yes	no	no	no gender		Isabelle			Archives of Current Research International			2020-01-16	2017
Shepherd, Andrew;	Approaches to linking producers to markets	Google scholar (Isabelle)	https://books.google.co.ke/books?hl=en&lr=&id=LHYT2HygceUC&oi=fnd&pg=PP7&ots=BmCNF3MoxU&sig=bbIDj_AriTAA-lrmm97PzSKJ2HI&redir_esc=y#v=onepage&q&f=false	yes	no	yes	no	no	no gender	yes	Isabelle	nothing on gender			13			2007	Food & Agriculture Org.
Elizabeth Bageant and Christopher Barett	Are There Gender Differences in Demand for Index-Based Livestock Insurance?	Research4Life (Emily)	Full article: Are There Gender Differences in Demand for Index-Based Livestock Insurance? (research4life.org)	Yes	Yes	Yes	no	no	no business model	No	Emily			The Journal od Development Studies	53	6	932-952	2017	Taylor and Francis
Julie M. K. Ojango, James Audho, Edwin Oyieng, Maren Radeny, Philip Kimeli,John Recha, Anne W. T. Muigai	Assessing actors in rural markets of sheep and goats in the Nyando Basin of Western Kenya: a key to improving productivity from smallholder farms	Emily's scoping review (Research4Life)	folder(litetarure_inclusive business models)	No- An analysis assessing actors in rural markets of sheep and goats	General	Yes	no	no	no business model		shakira Nagujja
Gold, Stefan; Seuring, Stefan; Jeff, Ajang Nnoko Ngaaje;	Barriers of food supply chains in Africa–a Delphi study	Google scholar (Isabelle)		no	no	yes	no	no	no business model		Isabelle			International journal of agricultural resources, governance and ecology	9	2020-03-04	228-246	2012	Inderscience Publishers Ltd
Tiwari, Jaya; Schaub, Emily; Sultana, Naziha	Barriers to “last mile” financial inclusion: cases from northern Kenya	Research4Life (Emily)	https://login.research4life.org/tacsgr1www_tandfonline_com/doi/full/10.1080/09614524.2019.1654432	Yes	Yes	Yes	yes	no	No livestock	Yes	Emily		Yes	Development in Practice	29	8	988-1000	2019
Zuinga, Martha Cruz; Lynn, Monty L; Mwesigwa, Elly Kaganzi; Norell, Dan; Sriram, Vidhya; Tumusiime, Emmanuel;	Better together: improving food security and nutrition by linking market and food systems	Google scholar (Isabelle)	see page 196 https://digitalcommons.acu.edu/cgi/viewcontent.cgi?article=1014&context=mgt_sciences	yes	yes	yes	no	no	No livestock		Isabelle							2019
G. Njiraini; M. Ngigi	Bridging gender gaps through innovations in agricultural value chains in Africa	development project websites	Development project folder	No	women only	yes	no	no	no business model		Shakira Nagujja
Brookside	Brookside dairy	web search	https://www.brookside.co.ke/	yes	no	yes	no	no	no gender		Isabelle	nothing on gender. I also searched on google scholar
Rubin, Deborah; Boonabaana, Brenda; Manfre, Cristina;	Building an inclusive agriculture: strengthening gender equality in agricultural value chains	Google scholar (Isabelle)	https://rtbfoods.cirad.fr/content/download/4186/31890/version/1/file/Building+an+inclusive+agriculture+-+Strengthening+gender+equality+in+agricultural+value+chains.pdf	yes	yes	yes	no	no	no business model	yes	Isabelle			Annual Trends and Outlook Report: Gender Equality in Rural Africa: from Commitments to Outcomes. International Food Policy Research Institute (IFPRI), Washington DC, Washington, DC			83-96	2019
Njoroge, Mary; Kaluyu, Veronicah;	Business Development Services Access as a Strategic Response to Market Disruption among Small and Medium Enterprises	Google scholar (Isabelle)		yes	no	yes	no	no	no gender		Isabelle			American Journal of Industrial and Business Management	10	8	1340-1359	2020	Scientific Research Publishing
Bill Vorley , Mark Lundy and James MacGregor	Business models that are inclusive of small farmers	Emily's scoping review (Research4Life)	folder(litetarure_inclusive business models)	Yes-various	General	Not clear	no	no	no gender		shakira Nagujja	Need another person to review it to decide whether to include or exclude
World Fair Trade Organization	Business Models that Empower Women: Insights and Inspiration from Fair Trade Enterprises	Emily's scoping review	folder(litetarure_inclusive business models)	yes-fair trade networks/enterprises	approach focuses mainly on women	Yes	yes	no	insufficient information		shakira Nagujja	Kindly help with this one too. Most of the enterprises that were targetted were not agricultural.
Ferdinand Adu-Baffour, Thomas Daum, and Regina Birner	Can Big Companies’ Initiatives to Promote Mechanization Benefit Small Farms in Africa? A Case Study from Zambia	Alessandra's scoping review	folder	Yes- Contract model	General data but gender disaggregated on only FGD's	Yes	yes	no	No livestock		Shakira Nagujja
Coppock, D Layne; Gebru, Getachew; Desta, Solomon; Tezera, Seyoum; Edea, Zewdu;	Can Pastoral Linkages to Livestock Markets Be Sustained in Southern Ethiopia?	Google scholar (Isabelle)		yes	no	yes	no	no	no gender		Isabelle							2009	University of California at Davis
Kalyani Raghunathan Samyuktha Kannan Agnes R. Quisumbing	Can women's self‐help groups improve access to information, decision‐making, and agricultural practices? The Indian case	Research4Life (Emily)	https://login.research4life.org/tacsgr1doi_org/10.1111/agec.12510	Yes	Yes	Yes	no	no	no business model	Yes	Emily			Agricultural Economics				2019
D. Layne Coppock, Solomon Desta, Seyoum Tezera and Getachew Gebru	Capacity Building Helps Pastoral Women Transform Impoverished Communities in Ethiopia	development project websites	Development project folder	yes	women are the main target group	yes	yes	yes			Shakira Nagujja		yes	Science,New Series	334	6061	1394-1398	2011	American Association for the Advancement of Science
KIT, Agri-pro focus , International Institute of Rural Reconstruction	Challenging chains to change: Gender equity in agricultural value chain development.	development project websites and google scholar	Development project folder	Yes- Case studies of various projects	women are the main target group	yes	yes	no	insufficient information	yes	shakira Nagujja	a literature review of case studies( how do i extract these). i cannot download them individually.						2006	Royal Tropical Institute
André Devaux, Claudio Velasco, Gastón López, Thomas Bernet, Miguel Ordinola, Papa Andina Initiative, International Potato Center	Collective Action for Innovation and Small Farmer Market Access: The Papa Andina Experience	Alessandra's scoping review	folder	Yes-collective action (PCMA and Stakeholder platforms)	General	Yes	no	no	No livestock		Shakira Nagujja	interesting paper but nothing on gender inclusiveness. A very good description of collective action and Ips	No	CAPRI working paper		68		2007	IFPRI
Froukje Kruijssen, Sudha Mysore	Collective action for the marketing of underutilized tropical fruits in South and Southeast Asia	Alessandra's scoping review	folder	Yes-Collective action	Women only (Not so clear)	Yes	no	no	no business model	No	Shakira Nagujja	Case studies
Ramachandran, Madhav Tipu; Das, Arindam	Collective farming and women’s livelihoods: a case study of Kudumbashree group cultivation	Research4Life (Emily)	https://login.research4life.org/tacsgr1www_tandfonline_com/doi/full/10.1080/02255189.2020.1799764	Yes	Yes	Yes	yes	no	No livestock	No	Emily	Paper is focussed on production and its relation to our research question is not there. But a second opinion on extracting it is welcome.	No	Revue canadienne d'études du développement	41	4		2020
Mesfin, A.	Comparative study on the performance of dairy cooperative input and output marketing in Astbie Womerta, Alamata and Enderta woreda in Tigray region, Ethiopia. Mekelle: Mekelle University.	Cgspace	https://cgspace.cgiar.org/handle/10568/83	yes	no	yes	no	no	no gender	yes	Isabelle	gender blind research
Ba, Mahamadou Nassirou;	Competiveness of Maize Value Chains for Smallholders in West Africa: Case of Benin, Ghana and Cote D’Ivoire	Google scholar (Isabelle)		no	no	yes	no	no	no business model		Isabelle			Agricultural Sciences	8	12	1372-1401	2017	Scientific Research Publishing
Bacon Chris	Confronting the Coffee Crisis: Can Fair Trade, Organic, and Specialty Coffees Reduce Small-Scale Farmer Vulnerability in Northern Nicaragua?	Alessandra's scoping review	folder	Yes-Organic and fair trade networks	General	yes	no	no	no business model		Shakira Nagujja
Lovemore C. Gwiriri, James Bennett, Cletos Mapiye, Tawanda Marandure & Sara Burbi	Constraints to the sustainability of a ‘systematised’ approach to livestock marketing amongst smallholder cattle producers in South Africa	Emily's scoping review (Research4Life)	folder(litetarure_inclusive business models)	Yes-collective marketing	general	yes	no	no	no gender		shakira Nagujja
Marc F. Bellemare	Contract farming: opportunity cost and trade-offs	Emily's scoping review (Research4Life)	folder(litetarure_inclusive business models)	yes- more of an economic estimation of contract farming	General	yes	no	no	no gender		shakira Nagujja
Raphala, Balefilwe Solomon;	Contract-farming: a case study of sunflower farming in the Bojanala district of the North West Province	Google scholar (Isabelle)		yes	no	yes	no	no	no gender		Isabelle							2007	University of Limpopo (Turfloop Campus)
Martiniello, Giuliano; Azambuja, Ricardo	Contracting Sugarcane Farming in Global Agricultural Value Chains in Eastern Africa: Debates, Dynamics, and Struggles	Research4Life (Emily)	https://login.research4life.org/tacsgr1journals_sagepub_com/doi/full/10.1177/2277976019851955?utm_source=summon&utm_medium=discovery-provider	Yes	No	Yes	no	no	no gender	Yes	Emily			Agrarian South: Journal of Political Economy	8		208-231	2019
Joseph I. Uduji and Elda N. Okolo-Obasi	Corporate social responsibility initiatives in Nigeria and rural women livestock keepers in oil host communities	Research4Life (Emily)	https://login.research4life.org/tacsgr0hinari_summon_serialssolutions_com/2.0.0/link?t=1609859906660	Yes	Women focused	Yes	no	no	no business model	Yes	Emily			Social responsibility journal	15	8		2019	Emerald
Ehui, Simeon; Tsigas, Marinos; Jenane, Chakib;	Developing Effective and Growth-sustaining Agribusiness Markets in Sub-Saharan Africa	Google scholar (Isabelle)		no	no	yes	no	no	no business model		Isabelle							2016
Immaculate Nduma, Patti Kristjanson and John McPeak	Diversity in income generating activities for sedentarized pastoral women in Northern Kenya	development project websites	Development project folder	No	women only	yes	no	no	no business model		Shakira Nagujja
Lambrecht, Isabel Brigitte; Ragasa, Catherine;	Do development projects crowd-out private sector activities? Evidence from contract farming participation in Northern Ghana	Google scholar (Isabelle)		yes	no	yes	no	no	no gender		Isabelle			Food Policy	74		2020-09-22	2018	Elsevier
Mercy Maiwa Mwambi; Judith Oduol; Patience Mshenga ; Mwanarusi Saidi	Does contract farming improve smallholder income? The case of avocado farmers in Kenya	Research4Life (Emily)	https://login.research4life.org/tacsgr1www_emerald_com/insight/content/doi/10.1108/JADEE-05-2013-0019/full/pdf?title=does-contract-farming-improve-smallholder-income-the-case-of-avocado-farmers-in-kenya	Yes	No	Yes	yes	no	no gender	Yes	Emily	No gender element . But has some general information on contract farming.	No	Journal of Agribusiness in Developing and Emerging Economies	6	1		2016
Joanne Sharp, John Briggs, Hoda Yacoub and Nabila Hamed	Doing gender and development: understanding empowerment and local gender relations	Emily's scoping review (Research4Life)	folder(litetarure_inclusive business models)	No	Women only	yes	no	no	no business model		shakira Nagujja
Heifer International	EAST AFRICA DAIRY DEVELOPMENT PROJECT:GENDER, DAIRY PRODUCTION AND MARKETING	development project websites	https://cgspace.cgiar.org/bitstream/handle/10568/2445/DairyNews%20Vol%205.pdf?sequence=1	Yes	gender disaggregated data	yes	no	no	no business model		shakira Nagujja
African Development Bank	Economic Empowerment of African Women through Equitable Participation in Agricultural Value Chains	development project websites	Development project folder	No	Women are the main target group	yes	no	no	no business model		Shakira Nagujja
Aika Aku, Patience Mshenga, Victor Afari-Sefa and Justus Ochieng	Effect of market access provided by farmer organizations on smallholder vegetable farmer’s income in Tanzania	Alessandra's scoping review	folder	Yes-Collective action (Farmer organization). Document reports an analysis	General	Yes	no	no	no business model		Shakira Nagujja
Mindy Price, Alessandra Galie, Jennifer Marshall & Ngozichukwuka Agu	Elucidating linkages between women’s empowerment in livestock and nutrition: a qualitative study	Emily's scoping review (Research4Life)	folder(litetarure_inclusive business models)	No	Women only	yes	no	no	no business model		shakira Nagujja
KRISHNA, HARIS;	Emerging Innovative Business Approaches in Indian Rural Retailing	Google scholar (Isabelle)		no	no	yes	no	no	no business model		Isabelle							2014
Grasty Jan	Empowering women farmers in the Agricultural value chain	development project websites	Development project folder	No- an analysis on existing gender dynamics in smallholder value chain	Women only	yes	no	no	no business model		Shakira Nagujja	Has case studies (projects) that have interventions implemented. There's need to access the detailed case studies to see how the interventions were implemented and the impact
Sabine Homann-Kee Tui	Empowering women in integrated Crop- livestock farming through innovation platforms: Experience in Semi-arid Zimbabwe	development project websites	Development project folder	No -but propose Innovation platforms	women only	yes	no	no	no business model		Shakira Nagujja
IPMS Ethiopia	Empowering women through value chain development: Good practices and lessons from IPMS experiences	development project websites	Development project folder	Yes	gender disaggregated data	yes	yes	yes			Shakira Nagujja		yes					2011	ILRI KMIS
Lemma, Mamusha; Tesema, Ephrem; Legesse, Dereje; Tesfaye, Beamlak;	Engendering Agricultural Value Chain Development: LIVES Project Approach and Experience in Addressing Gender Differentials in Extension Services	Google scholar (Isabelle)		no	yes	yes	no	no	no business model		Isabelle	no market interventions						2016
Asem-Bansah, Charles K; Sakyi-Dawson, O; Ackah-Nyamike, EE; Colecraft, EK; Marquis, GS;	Enhancing backyard poultry enterprise performance in the Techiman area: A value chain analysis	Google scholar (Isabelle)		yes	no	yes	no	no	no gender		Isabelle			African Journal of Food, Agriculture, Nutrition and Development	12	1	5759-5775	2012	AFRICAN SCHOLARLY SCIENCE COMMUNICATIONS TRUST (ASSCAT)
Taher, Md Abu; Nimalathasan, B;	Entrepreneurship Development Potentiality in Bangladesh: Lessons for Sri Lanka	Google scholar (Isabelle)		no	no	yes	no	no	no business model		Isabelle
NZARAMBA, KAYISIME;	ENTREPRENEURSHIP SKILLS DEVELOPMENT AND GROWTH OF SMALL AND MEDIUM ENTREPRISES IN RWANDA (CASE STUDY:“CAPLAKI”) 2007-2011	Google scholar (Isabelle)		no	no	yes	no	no	no business model		Isabelle							2012	Citeseer
Maina, Winnie;	Factors influencing performance of women owned micro and small enterprises in Kikuyu sub county, Kiambu county Kenya	Google scholar (Isabelle)		no	no	yes	no	no	no business model		Isabelle	focus on women businesses						2015	University of Nairobi
Heifer International Bangladesh	Farmers Owned Agribusiness (FOAB) -Sustainable Social and Economic Transformation (factsheet)	development project websites	Development project folder	No	general	yes	no	no	no business model		Shakira Nagujja
Saifullahi Sani Ibrahim, Huseyin Ozdeser & Behiye Cavusoglu	Financial inclusion as a pathway to welfare enhancement and income equality: Micro-level evidence from Nigeria	Emily's scoping review (Research4Life)	folder(litetarure_inclusive business models)	No	General	yes	no	no	no business model		shakira Nagujja
NpM - Platform for Inclusive Finance	FINANCIAL SERVICES FOR WOMEN: CASE STUDY ON WOMEN’S PARTICIPATION IN THE MAIZE AND BEAN VALUE CHAINS IN RWANDA	development project websites	Development project folder	No	women are the main target group	yes	no	no	no business model		Shakira Nagujja
Sanches-Pereira, Alessandro; Onguglo, Bonapas; Pacini, Henrique; Gómez, Maria F; Coelho, Suani Teixeira; Muwanga, Musa K;	Fostering local sustainable development in Tanzania by enhancing linkages between tourism and small-scale agriculture	Google scholar (Isabelle)		yes	no	yes	no	no	no gender		Isabelle			Journal of Cleaner Production	162		1567-1581	2017	Elsevier
Farnworth, Cathy Rozel	From Working in the Wheat Field to Managing Wheat: Women Innovators in Nepal	Research4Life (Emily)	From Working in the Wheat Field to Managing Wheat: Women Innovators in Nepal | SpringerLink	Yas	Yes	Yes	yes	no	no business model	Yes	Emi;y	No intervention. Looks at challenges women face as innovators	No	European journal of development research	31	2	293 - 313	2019
Evelyn Kiptot and Steve Franzel	Gender and agroforestry in Africa: a review of women’s participation	Research4Life (Emily)	https://link.springer.com/article/10.1007/s10457-011-9419-y	Yes	Yes	Yes	no	no	no business model	No	Emily	Forage production		Agroforestry Systems	84	1	35-58	2012	Springer
Jemimah Njuki and Pascal Sanginga	Gender and Livestock: Issues, Challenges and Opportunities	Emily's scoping review	folder(litetarure_inclusive business models)	No	Gender disaggregated data	Yes	no	no	no business model		shakira Nagujja
Miet Maertens & Johan F.M. Swinnen	Gender and Modern Supply Chains in Developing Countries	Emily's scoping review (Research4Life)	folder(litetarure_inclusive business models)	No- looked at rural labour markets	gender disaggregated data	yes	no	no	no business model		shakira Nagujja
Edemo Herego	Gender assessment of dairy value chains: evidence from Ethiopia	development project websites	Development project folder	no	gender disaggregated data	yes	no	no	no business model		Shakira Nagujja
Gerald Katothya	Gender assessment of dairy value chains: evidence from Kenya	development project websites	Development project folder	no	gender disaggregated data	Yes	no	no	no business model		Shakira Nagujja
Ayodeji Alexander Ajibola Coker Emmanuel Oladipo Akogun Cornelius Owoniyi Adebayo Shaba Mohammed Mercy Nwojo Halimat Sanusi Hamdalat Opeyemi Jimoh	Gender Differentials among Subsistence Rice Farmers and Willingness to undertake Agribusiness in Africa: Evidence and Issues from Nigeria	Research4Life (Emily)	https://login.research4life.org/tacsgr1onlinelibrary_wiley_com/doi/epdf/10.1111/1467-8268.12273	nO	Yes	Yes	no	no	no business model	Yes	Emily			African Development Review	29	2	198-212	2017	Wiley
Nicola J.C. Chanamuto & Stephen J.G. Hall	Gender equality, resilience to climate change, and the design of livestock projects for rural livelihoods	Emily's scoping review (Research4Life)	folder(litetarure_inclusive business models)	No	Gender disaggregated data	Not stated	no	no	no business model		shakira Nagujja
FAO	Gender opportunities and constraints in inclusive business models: The case of Unifrutti in Minadanao Phillipines	development project websites	Development project folder	yes	gender disaggregated data	yes	yes	no	No livestock		Shakira Nagujja		Yes					2015	FOOD AND AGRICULTURE ORGANIZATION OF THE UNITED NATIONS
Katie Tavenner, Todd A. Crane	Gender power in Kenyan dairy: cows, commodities, and commercialization	Emily's scoping review (Research4Life)	folder(litetarure_inclusive business models)	yes- business hubs (EADD)	gender disaggregated data	Yes	yes	no	no business model	Yes	shakira Nagujja		No
Elisabeth Fischer & Matin Qaim	Gender, agricultural commercialization, and collective action in Kenya	Alessandra's scoping review	folder in teams	Yes-Collective action but analysing it's impact on women's control of output, income and nutrition	Gender disaggregated data	yes	no	no	No livestock		Shakira Nagujja	Focus was on an analysis on the impact of the groups formed on women's control over output, income and nutrition
NANCY L. JOHNSON, CHIARA KOVARIK, RUTH MEINZEN-DICK, JEMIMAH NJUKI and AGNES QUISUMBING	Gender, Assets, and Agricultural Development: Lessons from Eight Projects	development project websites	Development project folder	No- focus on gender and asset ownership	gender disaggregated data	yes	no	no	no business model		Shakira Nagujja
Quisumbing Agnes R., Rubin Deborah Manfre Cristina Waithanji, Elizabeth van den Bold, Mara Olney, Deanna Johnson Nancy ,Meinzen-Dick Ruth	Gender, assets, and market-oriented agriculture: learning from high-value crop and livestock projects in Africa and Asia	Emily's scoping review (Research4Life)	folder(litetarure_inclusive business models)	No-a literature review on 4 case studies that show changes in gender relations and women's assets	gender disaggregated data	Yes	yes	yes		yes	shakira Nagujja
Corinne Valdivia	Gender, Livestock Assets, Resource Management, and Food Security: Lessons from the SR-CRSP	Emily's scoping review (Research4Life)	folder(litetarure_inclusive business models)	No	Gender disaggregated data	Yes	no	no	no business model		shakira Nagujja
Tara Deubel and Micah Boyer	Gender, Markets and Women’s Empowerment in the Sahel Region: A Comparative Analysis of Mali Niger, and Chad	development project websites	Development project folder	No	gender disaggregated data	yes	no	no	no business model		Shakira Nagujja
Ouma, Emily A; Ochago, Robert; Dione, Michel M; Birungi, Rosemirta; Lule, Peter M;	Gender-equitable pig business hubs in Uganda	Google scholar (Isabelle)	https://cgspace.cgiar.org/bitstream/handle/10568/78640/kettle_ch18.pdf?sequence=2	yes	yes	yes	no	no	no business model		Isabelle							2016	LM Publishers
Silja Heyland	Gender-Inclusion in Commercial Dairy Chains in the Global South.	development project websites	Development project folder	Yes- Case studies of various projects	women are the main target group	yes	yes	no	Insufficient information		shakira Nagujja	a literature review of case studies( how do i extract these). IB: poorly written and low quality. The recommendations in the last chapter are useful
Temesgen Bocher, Jan W. Low, Kirimi Sindi, Srinivasulu Rajendran	Gender-sensitive Value Chain Intervention Improved Profit Efficiency among Orange-fleshed Sweetpotato Producers in Rwanda	Alessandra's scoping review	Folder	Yes-gender-sensitive value chain intervention in sweet potato	gender disaggregated data	Yes- Rwanda	yes	no	No livestock	No	Shakira Nagujja		Yes	Open Agriculture	2		386–393	2017	De Gruyter Open
Ahmad, Waseem; Ahmed, Tanvir; Ahmad, Bashir	Hedonic pricing of goat characteristics at the market level: the case of Pakista	Research4Life (Emily)		No	No	Yes	no	no	no business model	No	Emily			IFAMR	22	4	483 - 497	2019
Johnson, Nancy; Balagamwala, Mysbah; Pinkstaff, Crossley; Theis, Sophie; Meinsen-Dick, Ruth; Agnes, Quisumbing;	How do agricultural development projects empower women? Linking strategies with expected outcomes	Google scholar (Isabelle)	https://ageconsearch.umn.edu/record/293596/files/JGAFS-322018-1-Paper.pdf	yes	yes	yes	no	no	insufficient information	yes	Isabelle			Journal of Gender, Agriculture and Food Security (Agri-Gender)	3	302-2019-3652	2020-01-19	2018
Takahashi, Kazushi; Shonchoy, Abu; Ito, Seiro; Kurosaki, Takashi;	How does contract design affect the uptake of microcredit among the ultra-poor? experimental evidence from the river islands of northern bangladesh	Google scholar (Isabelle)		yes	no	yes	no	no	no gender		Isabelle			The Journal of Development Studies	53	4	530-547	2017	Taylor & Francis
Ellen Mangnus	How inclusive businesses can contribute to local food security	Alessandra's scoping review	folder	No- describing how agribusinesses should be inclusive to contribute to food security	Generalised	Not specific	no	no	no business model		Shakira Nagujja
Asian Development Bank	How Inclusive is Inclusive Business for Women? Examples from Asia and Latin America	Research4Life (Emily)	https://www.adb.org/sites/default/files/publication/183942/inclusive-business-women.pdf	Yes	Yes	Yes	yes	no	insufficient information	Yes	Emily			Asian Development Bank				2016
Kimando, Lawrence Njogu; Sakwa, Maurice; Njogu, Mrs Grace Wachera;	Impact of business development services on enterprises in rural Kenya: A case study of micro and small enterprises in Muranga Town	Google scholar (Isabelle)		yes	no	yes	no	no	no gender		Isabelle			International Journal of Business and Commerce	1	9	149-165	2012
Vincent Ngeno	Impact of dairy hubs on smallholder welfare: empirical evidence from Kenya	Emily's scoping review (Research4Life)	folder(litetarure_inclusive business models)	yes-but this specifically analyses the determinants and welfare impacts of participating in dairy hub (From EADD project)	General	Yes	no	no	no gender		shakira Nagujja
Kerstin Schöll, André Markemann, Bekele Megersa, Regina Birner,Anne Valle Zárate	Impact of projects initiating group marketing of smallholder farmers—A case study of pig producer marketing groups in Vietnam	Alessandra's scoping review	folder in teams	yes - collective action	Generalised - though some groups were exclusivley for women	yes	yes	no	insufficient information		Emily Ouma		Yes	Journal of Co-operative Organization and Management		4	31-41	2016	Elsevier
Christine G.K. Chege, Camilla I.M. Andersson and Matin Qaim	Impacts of supermarkets on farm household nutrition in Kenya	Alessandra's scoping review	folder in teams	yes - supermarket contracts	General - but assesses gendered effects through an econometric model	yes	yes	no	no business model	yes	Emily Ouma	The paper analyses the impact of supermarket contracts on nutrition. How the farmers got the contracts is not known.Should it be included as a background paper? because of the journal we are publishing it	yes	RTG 1666 GlobalFood		31		2014	Georg-August-University of Göttingen
Man-Kwun Chan	Improving Opportunities for Women in Smallholder-based Supply Chains: Business case and practical guidance for international food companies	development project websites	Development project folder	No- Is a practical guide	women only	yes	no	no	no business model		Shakira Nagujja
ACM (Guus) van Westen, Ellen Mangnus, James Wangu and Senait Getahun Worku	Inclusive agribusiness models in the Global South: the impact on local food security	Alessandra's scoping review	folder in teams	yes - various	General, looking at effects of inclusive business models on food security in general	yes	no	no	insufficient information	Yes	Emily Ouma	background paper about why inclusive business models are now 'in fashion' but are insufficient to have impact on food security. Need to complement with policies etc
Tommasi, E;	Inclusive Business and Food Nutrition Security in Ethiopia: A case study on the contributions of six Dutch inclusive agribusinesses to Food Nutritition Security in Ethiopia	Google scholar (Isabelle)		yes	no	yes	yes	no	no gender		Isabelle	interesting way of profiling companies, but no gender focus	yes					2018
Pouw, Nicky; de Winter, Daniëlle; Minderhoud, Katie; Lammers, Ellen;	Inclusive business for sustainable food systems	Google scholar (Isabelle)	https://www.researchgate.net/profile/Nicky_Pouw/publication/340377109_Inclusive_business_for_sustainable_food_systems_Putting_the_last_first/links/5e85a129a6fdcca789e8f74b/Inclusive-business-for-sustainable-food-systems-Putting-the-last-first.pdf	yes	yes	yes	no	no	insufficient information	yes	Isabelle
Kelly, Siobhan; Vergara, Natalie; Bammann, Heiko;	Inclusive business models	Google scholar (Isabelle)		no	yes	yes	no	no	no business model	yes	Isabelle			Rome: Food and Agriculture Organization of the United Nations				2015
Claude Menard and Wytse Vellema	Inclusive Business Models in Agri-food Value Chains: What Safeguards for Whom?	Research4Life (Emily)	https://www.tandfonline.com/doi/full/10.1080/15228916.2019.1658842	Yes	No	Yes	yes	no	no gender	Yes	Emily	More of a backgound paper	No	Journal of African Business	21	3	395-415	2020
Rüdiger Hahn	Inclusive business, human rights and the dignity of the poor: a glance beyond economic impacts of adapted business models	Emily's scoping review (Research4Life)	folder(litetarure_inclusive business models)	No	General	Not stated	no	no	no business model		shakira Nagujja
Chamberlain, Wytske; Anseeuw, Ward;	Inclusive businesses in agriculture: What, how and for whom? Critical insights based on South African cases	Google scholar (Isabelle)		yes	no	yes	no	no	no gender	yes	Isabelle							2017	Sun Press
Gebru, Kebede Manjur	Inclusive malt barley business and household food security in Lay Gayint district of northern Ethiopia	Research4Life (Emily)	https://link.springer.com/article/10.1007%2Fs12571-019-00939-6	Yes	No	Yes	no	no	no gender	Yes	Emily			Food security	11		953-966	2019
Marc Steen and Woody Maijers	Inclusiveness of the Small-Holder Farmer Key Success Factors for Ethiopian Agribusiness Development	development project websites	Development project folder	yes	general	yes	no	no	insufficient information		Shakira Nagujja
Kalpana Beesabathuni Srujith Lingala Klaus Kraemer	Increasing egg availability through smallholder business models in East Africa and India	Research4Life (Emily)	https://login.research4life.org/tacsgr1onlinelibrary_wiley_com/doi/epdf/10.1111/mcn.12667	Yes	No	Yes	yes	yes		Yes	Emily		yes	Maternal and Child Nutrition	14	3		2018	Wiley
Gea D. M. Wijers	Inequality regimes in Indonesian dairy cooperatives: understanding institutional barriers to gender equality	Research4Life (Emily)	https://link.springer.com/article/10.1007/s10460-018-09908-9	Yes	Yes	Yes	yes	yes		Yes	Emily		Yes	Agriculture and Human Values	36		167 - 181	2019	Springer
Martín, Dolores Lucía Sutil; Ruiz, Samuel Fernando Ricardo;	Innovation at the beginning of the value chain of coffee production as a route towards development of inclusive business with a gender perspective.	Google scholar (Isabelle)	http://www.academia.edu/download/56936709/2018-PAPER_-_FINAL.pdf https://www.researchgate.net/publication/326211762_Innovation_at_the_beginning_of_the_value_chain_of_coffee_production_as_a_route_towards_development_of_inclusive_business_with_a_gender_perspective Outcomes indicators not clearly defined nor measured. A case study	yes	yes	yes	no	no	no business model		Isabelle
Samuel Adjei-Nsiah, and Laurens Klerkx	Innovation platforms and institutional change: the case of small-scale palm oil processing in Ghana	Alessandra's scoping review	folder in teams	yes - Innovation platforms	Women are the main target group - as they are the palm oil processors	yes	yes	no	no business model		Emily Ouma		Yes(require second opinion) Isabelle: done	Cah. Agric.	25	65005		2016	EDP sciences
Chitja, Joyce M; Mabaya, Edward;	Institutional Innovations Linking Small-Scale Farmers To Produce Markets In South Africa	Google scholar (Isabelle)		yes	no	yes	no	no	no gender		Isabelle			Innovative Institutions, Public Policies and Private Strategies for Agro-Enterprise Development			2020-01-23	2015	World Scientific
International Finance Corporation	Investing in Women along Agribusiness Value Chains.	development project websites	Development project folder	Yes	women are the main target group	yes	no	no	No livestock		Shakira Nagujja
James Wangu, Ellen Mangnus, A.C.M. (Guus) van Westen	Limitations of Inclusive Agribusiness in Contributing to Food and Nutrition Security in a Smallholder Community. A Case of Mango Initiative in Makueni County, Kenya	Research4Life (Emily)	https://login.research4life.org/tacsgr1doi_org/10.3390/su12145521	Yes	No	Yes	no	no	no gender	Yes	Emily			Sustainability	12	5521		2020
Jemimah Njukia, Susan Kaariab, Angeline Chamunorwac and Wanjiku Chiuri	Linking Smallholder Farmers to Markets, Gender and Intra-Household Dynamics: Does the Choice of Commodity Matter?	Emily's scoping review (Research4Life)	folder(litetarure_inclusive business models)	No- analyzed the distribution of income between men and women in households, focusing on what influences women’s control of income from agricultural markets	Gender disaggregated data	Yes	no	no	no business model		shakira Nagujja
MATTHEW D. TURNER	Livestock Market Dynamics and Local Vulnerabilities in the Sahel	Emily's scoping review (Research4Life)	folder(litetarure_inclusive business models)	No	General	Yes	no	no	no business model		shakira Nagujja
Neetu Sharma, Shalander Kumar, Padmaja Ravula, Prakash Tyagi	Mainstreaming Gender and Empowering Women in Agriculture in the Thar Region of India	development project websites	Development project folder	yes	women are the main target group	yes	yes	no	No livestock		Shakira Nagujja		yes	Innovation Systems for the Drylands		69		2016	ICRISAT Research Program
Kevin McKague and Muhammad Siddique. 2014.	Making Markets More Inclusive: Lessons from Care and the Future of Sustainability in Agricultural Value Chain Development.	Emily's scoping review	folder(litetarure_inclusive business models)	Yes- But is a book review that does not explain much in detail	General	not stated	no	no	insufficient information		shakira Nagujja
Jane Carter, Md. Gias Uddin Talukder, Zenebe Bashaw Uraguchi	MAKING MARKETS WORK FOR POOR AND EXTREME POOR WOMEN IN BANGLADESH:the experience of Samriddhi	development project websites	Development project folder	No	gender disaggregated data	yes	no	no	no business model		Shakira Nagujja
Botha, Melodi;	Measuring the effectiveness of the women entrepreneurship programme, as a training intervention, on potential, start-up and established women entrepreneurs in South Africa	Google scholar (Isabelle)	https://repository.up.ac.za/handle/2263/29479	yes	yes	yes	yes	no	no business model		Isabelle		yes					2006	University of Pretoria
Christie Peacock and Thomasine Hastings	Meru dairy goat and animal healthcare project	Research4Life (Emily)	https://doi.org/10.3763/ijas.2010.0571	Yes	Yes	Yes	yes	yes		No	Emily		Yes	International Journal of Agricultural Sustainability	9	1	203-211	2011
Gebre-Egziabher, Tegegne; Demeke, Mulat;	Micro Enterprises in Small Town, Amhara Region, Ethiopia: Nature and Performance	Google scholar (Isabelle)		no	no	yes	no	no	no business model		Isabelle			Ethiopian journal of economics	14	1	79-111	2005
Alam, Md Mahmudul; Molla, Rafiqul Islam; Hossain, Mohammad Muntasir;	Microentrepreneurship Development in Bangladesh: Achievements and Shortcomings	Google scholar (Isabelle)		no	no	yes	no	no	no business model		Isabelle							2010	LAP Lambert Academic Publishing AG & Co. KG
Marlene Elias, Seema Arora-Jonsson	Negotiating across difference: Gendered exclusions and cooperation in the shea value chain	Research4Life (Emily)	https://login.research4life.org/tacsgr1doi_org/10.1177/0263775816657084	Yes	Yes	Yes	yes	no	no business model	No	Emily		Yes	Environment and Planning D: Society and Space	35	1	107-125	2016	SAGE
Jeremy Lind, Rachel Sabates-Wheeler, Matteo Caravani, Luka Biong Deng Kuol, Deborah Manzolillo Nightingale	Newly evolving pastoral and post-pastoral rangelands of Eastern Africa	Research4Life (Emily)	https://pastoralismjournal.springeropen.com/articles/10.1186/s13570-020-00179-w	No	No	yes	no	no	no business model	no	Emily			Pastoralism : research, policy and practice	10	1		2020	Springer
Alam, Md Mahmudul; Hossain, Mohammad Muntasir; Zaman, Farhana;	Non-Institutional Barriers of Micro-Entrepreneurship Development in Bangladesh	Google scholar (Isabelle)		no	no	yes	no	no	no business model		Isabelle							2011
Alam, Md; Hossain, Mohammad; Zaman, Farhana;	Non-institutional factors affecting microentrepreneurship development in Bangladesh	Google scholar (Isabelle)		no	no	yes	no	no	no business model		Isabelle			Alam, MM, Hossain, MM, and Zaman, F			240-247	2011
Vellema, Sietze; Schouten, Greetje; Tulder, Rob	Partnering capacities for inclusive development in food provisioning	Research4Life (Emily)	https://login.research4life.org/tacsgr1onlinelibrary_wiley_com/doi/epdf/10.1111/dpr.12466	Yes	Yes	Yes	yes	no	no business model	Yes	Emily	background paper, has 2 case stsudy examples that i have not been able to extract. Not gender based.	No	Development policy review	38	6	710-727	2020
Pratyusha Basu, Alessandra Galiè, Isabelle Baltenweck	Presence and property: Gendered perspectives on participation in a dairy development program in Kenya and Uganda	Emily's scoping review (Research4Life)	folder(litetarure_inclusive business models)	no	Gender disaggregated data	yes	no	no	no business model		shakira Nagujja	Need another person to review it to decide whether to include or exclude IB: exclude
Berk, Ali;	Processor Driven Integration of Small-Scale Farmers into Value Chains in Turkey	Google scholar (Isabelle)		yes	no	yes	no	no	no gender		Isabelle			FAO Report			33	2013
Borodina, Olena;	Processor Driven Integration Of Small-Scale Farmers Into Value Chains In Ukraine	Google scholar (Isabelle)		yes	no	no	no	no	no gender		Isabelle			Report prepared within the framework of FAO Agrarian Structures Initiative. ʹ				2013
Heifer International Bangladesh	Promoting Goat Value Chain to Secure Living Income of Small-scale Farmers(factsheet)	development project websites	Development project folder	No- Intervention was yet to be tested	general	yes	no	no	no business model		shakira Nagujja
Markel Erin and Lindsey Jones	Promoting Women’s Economic Empowerment: Beyond-Production in Market Systems Programs.	development project websites	Development project folder	Yes (case studies)	women are the main target group	yes	yes	no	insufficient information		Shakira Nagujja	This brief has not been extracted as the case studies mentioned are the same as those that have been extracted from other documents extracted.	No(similar case studies)
Bekena, Negash; Greiling, Juergen;	Quality Focused Apiculture Sector Value Chain Development in Ethiopia	Google scholar (Isabelle)		yes	no	yes	no	no	no gender		Isabelle			Journal of Agricultural Science and Technology A	7		107-116	2017
Ruerd Ruben, Alemayehu Dekeba Bekele & Birhanu Megersa Lenjiso	Quality upgrading in Ethiopian dairy value chains: dovetailing upstream and downstream perspectives	Alessandra's scoping review	folder in teams	no - analysis of farmers willingness to invest in dairy upgrading and consumer WTP for improved dairy products	none	no intervention	no	no	no business model		Emily Ouma
Asongu, Simplice A and Nwachukwu, Jacinta Chikaodi	Recent finance advances in information technology for inclusive development: a systematic review	Emily's scoping review (Research4Life)	folder(litetarure_inclusive business models)	No	General	Not clear	no	no	no business model		shakira Nagujja
Mahmoud, Hussein Abdullahi	Risky Trade, Resilient Traders: Trust and Livestock Marketing in Northern Kenya	Research4Life (Emily)	https://tinyurl.com/y4slhx5p	Yes	No	Yes	no	no	no gender	No	Emily	Marketing innovations to mitigate risks in pastoral systems			78	4	561-581	2008	Edinburgh University Press
Twine, Edgar; Omore, Amos O;	Securing more income for marginalized communities in Tanzania through dairy market hubs–Mid-term progress report on the MoreMilkIT project	Google scholar (Isabelle)		yes	no	yes	no	no	no gender		Isabelle							2016	ILRI (aka ILCA and ILRAD)
Birgit K. Boogaard, Elizabeth Waithanji, Elizabeth J. Poole, Jean-Joseph Cadilhon	Smallholder goat production and marketing: a gendered baseline study from Inhassoro District Mozambique	Emily's scoping review (Research4Life)	folder(litetarure_inclusive business models)	No	Gender disaggregated data	Yes	no	no	no business model		shakira Nagujja
Zeyen, Anica; Beckmann, Markus; Akhavan, Roya;	Social entrepreneurship business models: Managing innovation for social and economic value creation	Google scholar (Isabelle)		no	no	yes	no	no	no business model		Isabelle			Managementperspektiven für die Zivilgesellschaft des 21. Jahrhunderts			107-132	2014	Springer
Abdrahmane WaneJean-Joseph CadilhonMamadou YauckMamadou Yauck	Socioeconomic impacts of innovative dairy supply chain practices – The case of the Laiterie du Berger in the Senegalese Sahel	Research4Life (Emily)	(22) (PDF) Socioeconomic impacts of innovative dairy supply chain practices – The case of the Laiterie du Berger in the Senegalese Sahel (researchgate.net)	Yes	No	Yes	yes	yes		No	Emily		yes	IFAMR	20	4		2017
Thomas-Francois, Kimberly; Von Massow, Michael; Joppe, Marion;	Strengthening farmers–hotel supply chain relationships: A service management approach	Google scholar (Isabelle)		yes	no	yes	no	no	no gender		Isabelle			Tourism Planning & Development	14	2	198-219	2017	Taylor & Francis
Herbert Kyeyamwa,Wim Verbeke ,Stijn Speelman,John Opuda-Asibo &Guido Van Huylenbroeck	Structure and Dynamics of Livestock Marketing in Rural Uganda: Constraints and Prospects for Research and Development	Research4Life (Emily)	https://login.research4life.org/tacsgr1doi_org/10.1080/08974430802355523	No	No	Yes	no	no	no business model	Yes	Emily	Background info on the models that may work		Journal of International Food & Agribusiness Marketing	20	4		2008	Taylor and Francis
Rijike	Successful models to empower women in Out grower schemes	development project websites	Development project folder	No	Women only	yes	no	no	no business model		Shakira Nagujja
Guido Porto, Nicolas Depetris Chauvin and Marcelo Olarreaga	Supply Chains in Export Agriculture, Competition, and Poverty in Sub-Saharan Africa	Alessandra's scoping review	folder in teams	yes- but more macro level for export crop supply chans	none	no	no	no	no gender		Emily Ouma
Stevenson, Lois; St-Onge, Annette;	Support for growth-oriented women entrepreneurs in Uganda	Google scholar (Isabelle)	https://www.afdb.org/fileadmin/uploads/afdb/Documents/Policy-Documents/GOWE_Uganda.pdf	yes	no	yes	no	no	no gender	yes	Isabelle							2005	Programme on Boosting Employment through Small Enterprise Development, Job …
Minakshi, Anil K Swain; Kaur, Amrita;	Sustainable agricultural marketing strategies and practices: an Indian experience	Google scholar (Isabelle)		no	no	yes	no	no	no business model		Isabelle			Emerging Dynamics of Sustainability in Multinational Enterprises			250	2016	Edward Elgar Publishing
Stefanie Lemke, Farideh Yousefi, Ana C. Eisermann, Anne C. Bellows	Sustainable Livelihoods Approaches for Exploring Smallholder Agricultural Programs Targeted at Women: Examples from South Africa	Research4Life (Emily)	https://login.research4life.org/tacsgr1doaj_org/article/4f966bd7edd540589330a0fc4355dfb6	No	Yes	Yes	No	No	no business model	Yes	Emily			JOURNAL OF AGRICULTURE, FOOD SYSTEMS, AND COMMUNITY DEVELOPMENT	3	1		2016
Muth, PC; Huyen, LTT; Markemann, A; Zárate, A Valle;	Tailoring slaughter weight of indigenous Vietnamese Ban pigs for the requirements of urban high-end niche markets	Google scholar (Isabelle)		yes	no	yes	no	no	no gender		Isabelle			NJAS-Wageningen Journal of Life Sciences	80		27-36	2017	Elsevier
S. Ghosh & J. Rajan	The business case for SDGs: an analysis of inclusive business models in emerging economies	Emily's scoping review (Research4Life)	folder(litetarure_inclusive business models)	No- an analysis of inclusive business (IB) models as market-based solutions to contribute to the achievement of the SDGs	General	Not stated	no	no	no business model		shakira Nagujja
Hartati Ayub M. Padangaran, Azhar Bafadal, Bahari, Ahmad M. Nuryadi, Muhammad Nur, Sitti Rosmalah	The business models for broiler production in South Konawe Regency of South-East Sulawesi Province, Indonesia	Emily's scoping review (Research4Life)	folder(litetarure_inclusive business models)	No	General	yes	no	no	no business model		Shakira Nagujja
Annisa Ramadanti, Arief Daryanto, dan Sukardi	The Dairy value chain,inclusive business model and inclusiveness improvement of Southern Banding Dairy Cooperative(KPBS) Pangalegan	Emily's scoping review (Research4Life)	folder(litetarure_inclusive business models)	Yes- collective action	general	yes	no	no	no gender		shakira Nagujja
Sharaunga, Stanley	The Effectiveness of Women's Skills Development to Household Poverty Reduction: The Case of Msinga Rural Areas	Research4Life (Emily)	https://login.research4life.org/tacsgr1doi_org/10.1002/pop4.247	Yes	Yes	Yes	yes	no	no business model	Yes	Emily	Intervention is not clear. It was more of an econometric analysis of the importance of skill develpment.	No	Poverty & public policy	11			2019
Ugulumu, Enock S; Inanga, Eno L;	The Effects of Trust in the Development of Business Linkages and Relationships Between Sunflower Growers and Buyers: A Case 0f Small Scale Growers in Singida Region, Tanzania	Google scholar (Isabelle)		yes	no	yes	no	no	no gender		Isabelle
Teng, Paul S; Oliveros, Jurise AP;	The enabling environment for inclusive agribusiness in Southeast Asia	Google scholar (Isabelle)		no	no	yes	no	no	no business model		Isabelle			Asian Journal of Agriculture and Development	13	1362-2017-769	2020-01-20	2016
Quak, Evert-jan;	The impact of creating backward and forward linkages between lead firms and SMEs in conflict settings	Google scholar (Isabelle)		no	no	yes	no	no	no business model		Isabelle							2019	IDS
L. N. SANYA , P. LUSEMBO, K. M. SCOW, D. B. MAGALA, M. ALLEN, R. N. GAFABUSA, W. N. NAKYAGABA, I. MUGISA, S. MWEBE, A. SALOMON and S. MAYANJA	The participatory market chain approach: Stimulating innovations along the indigenous African leafy vegetables market chain	Alessandra's scoping review	folder in teams	yes-PMCA	approach mainly focusses on women	yes	yes	no	no business model		Emily Ouma		yes	African Journal of Rural Development	3	1	677-694	2018
Luigi Orsi, Ivan De Noni, Stefano Corsi, Laura Viviana Marchisio	The role of collective action in leveraging farmers' performances: Lessons from sesame seed farmers' collaboration in eastern Chad	Alessandra's scoping review	folder in teams	yes - collective action in leveraging farmers perfomance	gender disaggregated data	yes	yes	no	no business model		Emily Ouma	The paper shows an analysis of the role of farmer organization on their performance. No information on hw the intervention was implemented and the outcomes.	No( not sure whether it can be a background paper)	Journal of Rural Studies	51		93-104	2017	Elsevier
Tefera, E.	The role of dairy cooperatives in stimulating innovation and market oriented smallholders development: the case of Ada’a dairy cooperative, Central Ethiopia. MSc thesis (Rural Development and Agricultural Extension). 128p. Haramaya (Ethiopia): Haramaya University.	Cgspace	https://cgspace.cgiar.org/handle/10568/681	yes	no	yes	no	no	no gender	yes	Isabelle	gender blind research
Rahma Isaack Adam, Philip Osano, Joan Birika, Atieno A. Ndede Amadi & Henry Bwisa	The situation of women in the agribusiness sector in Africa	Research4Life (Emily)	https://login.research4life.org/tacsgr1doi_org/10.1080/09614524.2017.1338670	No	Yes	Yes	no	no	no business model	Yes	Emily			Development in Practice	27	6	892-898	2017	Taylor and Francis
Frank E. Mmbando, Edilegnaw Z. Wale & Lloyd J.S. Baiyegunhi	The welfare impacts of market channel choice by smallholder farmers in Tanzania	Alessandra's scoping review	folder in teams	no - econometric estimation of farmers market outlet choice	no	no	no	no	no business model		Emily Ouma
, Owuraku; Kudadjie-Freeman, Comfort; Tambi, Emmanuel N; Odularu, Gbadebo;	Tools and strategies for designing gender-sensitive policies for linking smallholder agricultural producers to regional markets	Google scholar (Isabelle)	file in Teams	yes	yes	yes	no	no	no business model	yes	Isabelle							2012	Forum for Agricultural Research in Africa
Sicelo Ignatius Dlamini, Wen-Chi Huang	Towards Intensive Co-operated Agribusiness: A Gender-Based Comparative Borich Needs Assessment Model Analysis of Beef Cattle Farmers in Eswatini	Research4Life (Emily)	Towards Intensive Co-operated Agribusiness: A Gender-Based Comparative Borich Needs Assessment Model Analysis of Beef Cattle Farmers in Eswatini – Directory of Open Access Journals (DOAJ) (research4life.org)	No	Yes	Yes	yes	no	no business model	Yes	Emily			Agriculture	10	96	96	2020	MDPI AG
J. NGUGI, S. MUIGAI and F. MUHORO	TRANSFORMING AGRICULTURE THROUGH CONTRACTED EXTENSION SERVICE DELIVERY SYSTEMS: THE CASE OF KENYA’S AGRICULTURAL PRODUCTIVITY AND AGRIBUSINESS PROJECT	Alessandra's scoping review	folder in teams	yes - extension model that enhances farmer linkages with input suppliers and output markets	gender disaggregated data	yes	yes	no	insufficient information		Emily Ouma		Yes	African Crop Science Journal	22	s4	905-915	2014	African Crop science society
Birhanu Megersa Lenjiso, Jeroen Smits & Ruerd Ruben	Transforming Gender Relations through the Market: Smallholder Milk Market Participation and Women`s Intra-household Bargaining Power in Ethiopia	Research4Life (Emily)	https://www.tandfonline.com/doi/full/10.1080/00220388.2016.1139693	No	Yes	Yes	yes	no	no business model	Yes	Emily	No intervention, so didnot extract but its also a background paper	No	The Journal of Development Studies	52	7	1002 - 1018	2016	Routledge
Twine, Edgar E; Omore, Amos; Githinji, Julius	Uncertainty in milk production by smallholders in Tanzania and its implications for investment	Research4Life (Emily)		No	No	Yes	no	no	no business model	No	Emily			IFAMR	21	1	53 - 72	2017
Seville, Don; Buxton, Abbi; Vorley, William;	Under what conditions are value chains effective tools for pro-poor development?	Google scholar (Isabelle)	http://www.sustainablefoodlab.org/wp-content/uploads/2016/02/Value-Chains-and-the-Poor_IIED.pdf	yes	no	yes	no	no	no gender	yes	Isabelle							2011	International Institute for Environment and Development London
BLESSING MASAMHA , VUSILIZWE THEBE and VERONICA N.E. UZOKWE	UNLOCKING THE HOUSEHOLD ‘BLACK BOX’: A GENDERED ANALYSIS OF SMALLHOLDER FARMERS’ PARTICIPATION IN THE CASSAVA (Manihot esculenta crantz) VALUE CHAIN IN TANZANIA	Emily's scoping review (Research4Life)	folder(litetarure_inclusive business models)	No - an analysis to understand women’s decisions relating to their participation in the cassava value chain.	gender disaggregated data	Yes	no	no	no business model		shakira Nagujja
Freeman, Comfort Kudadjie; Richards, Paul; Struik, Paul C;	Unlocking the potential of contract farming: Lessons from Ghana	Google scholar (Isabelle)		yes	no	yes	no	no	no gender		Isabelle			Gatekeeper	139		2020-01-24	2008
Lovemore C. Gwiriri James Bennett Cletos Mapiye Sara Burbi	Unpacking the ‘Emergent Farmer’ Concept in Agrarian Reform: Evidence from Livestock Farmers in South Africa	Research4Life (Emily)	https://login.research4life.org/tacsgr1onlinelibrary_wiley_com/doi/full/10.1111/dech.12516	No	No	Yes	no	no	no business model	No	Emily			Development and Change	50	6	1664-1686	2019	IDS
Catherine Kilelu, Laurens Klerkx, Amos Omore, Isabelle Baltenweck, Cees Leeuwis & Julius Githinji	Value Chain Upgrading and the Inclusion of Smallholders in Markets: Reflections on Contributions of Multi-Stakeholder Processes in Dairy Development in Tanzania	Research4Life (Emily)		Yes	No	Yes	no	no	no gender	Yes	Emily			The European Journal of Development Research	29		1102–1121	2017	Springer
Reji, Edakkandi Meethal;	Value chains and small enterprise development: Theory and praxis	Google scholar (Isabelle)		no	no	yes	no	no	no business model		Isabelle							2013	Scientific Research Publishing
Zvinorova, P.I., Halimani, T.E., Mano, R.T. et al.	Viability of smallholder dairying in Wedza, Zimbabwe	Research4Life (Emily)	https://doi.org/10.1007/s11250-012-0325-8	No	Yes	Yes	no	no	no business model	Yes	Emily			Trop Anim Health Prod 45, 1007–1015 (2013)	45		1007-1015	2013	Springer
Dzodzi Tsikata and Joseph Awetori Yaro	When a Good Business Model is Not Enough: Land Transactions and Gendered Livelihood Prospects in Rural Ghana	Research4Life (Emily)	https://login.research4life.org/tacsgr1doi_org/10.1080/13545701.2013.866261	No	Yes	Yes	no	no	no business model	No	Emily	Focussed more on land transactions		Feminist Economics	20	1		2014
Mercy Mwambi, Jos Bijman, and Patience Mshenga	Which type of producer organization is (more) inclusive? Dynamics of farmers’ membership and participation in the decision-making process	Emily's scoping review (Research4Life)	folder(litetarure_inclusive business models)	no	General	yes	no	no	no business model		shakira Nagujja
Pragya Bhandaria and Rajbir Singh	Women empowerment through livestock based enterprises	development project websites	Development project folder	No-suggestions of various models	women are the main target group	yes	no	no	no business model		Shakira Nagujja
Njiraini, Georgina; Ngigi, Marther; Baraké, Evelyn;	Women in African Agriculture: Integrating Women into Value Chains to Build a Stronger Sector	Google scholar (Isabelle)	https://papers.ssrn.com/sol3/papers.cfm?abstract_id=3266365	no	yes	yes	no	no	no business model	yes	Isabelle							2018	ZEF Working Paper Series 175
Caselli-Mechael E	Women in Cross-Border Agricultural Trade.	development project websites	Development project folder	No	women are the main target group	yes	no	no	no business model		Shakira Nagujja
Clugston Claire	Women in Non production roles: A literature review of promising practices.	development project websites	Development project folder	Yes	women only	yes	yes	no	insufficient information		Shakira Nagujja	Has case studies (projects) that have interventions implemented. I was able to dwnload the one tht majorly looked at the marketing value chain. 1 is an online article and 3 are project reports/summaries. These are what i have extracted.	yes(4 case studies)
Jemimah Njuki and Pascal C. Sanginga	WOMEN, LIVESTOCK OWNERSHIP AND MARKETS: Bridging the gender gap in Eastern and Southern Africa	development project websites	Development project folder	No	gender disaggregated data	yes	no	no	no business model		Shakira Nagujja	A literature review of recommendations
CARE	Women’s engagement in pastoral value chains in Northern Kenya: Understanding gender in Livestock value chains.	development project websites	Development project folder	No	women are the main target group	yes	no	no	no business model		Shakira Nagujja
Elizabeth Waithanji, Jemimah Njuki and Nabintu Bagalwa	Women’s Participation in Livestock Markets	development project websites	Development project folder	No	gender disaggregated data	yes	no	no	no business model		Shakira Nagujja
Joseph Ikechukwu Uduji, Elda Nduka Okolo-Obasi, Simplice Asongu	Women’s participation in the offshore and inshore fisheries entrepreneurship: The role of CSR in Nigeria’s oil coastal communities	Research4Life (Emily)	https://login.research4life.org/tacsgr1www_emerald_com/insight/content/doi/10.1108/JEC-01-2020-0010/full/html	Yes	Yes	Yes	yes	no	no business model	No	Emily	Intervention is not expalined properly and how it was tested. I am not able to extract according to the variables in data extraction. Need some assistance.	No	Journal of Enterprising Communities: People and Places in the Global Economy	14	2	247-275	2020
